# Supplementary material
Source: PubMed Central journal article supplement (PMC4828913)
Supplement: NIHMS774786-supplement-Supporting_Information.pdf [file NIHMS774786-supplement-Supporting_Information.pdf]

## Supporting Information

### Human telomere G-quadruplexes with five repeats accommodate

### 8-oxo-7,8-dihydroguanine by looping out the DNA damage

Na An, Aaron M. Fleming, and Cynthia J. Burrows\*

Department of Chemistry, University of Utah, 315 S 1400 East, Salt Lake City, UT 84112-0850

\*To whom correspondence should be addressed: (801) 585-7290

E-mail: [burrows@chem.utah.edu](mailto:burrows@chem.utah.edu)

| <b>Item</b>                                                                             | <b>Page</b> |
|-----------------------------------------------------------------------------------------|-------------|
| <b>Figure S1.</b> <sup>1</sup> H-NMR for the five-repeat hTelo sequences.               | S2          |
| <b>Figure S2.</b> CD and $T_m$ results for the five-repeat hTelo sequences in 1 M salt. | S4          |
| <b>Figure S3.</b> Example <i>i-t</i> traces for the five-repeat hTelo sequences.        | S5          |
| <b>Figure S4.</b> Time dependency on voltage for the triplex fold (Type 1 events).      | S17         |
| <b>Figure S5.</b> Time dependency on voltage for the hybrid folds (Type 2 events).      | S17         |

**Figure S1.**  $^1\text{H-NMR}$  for the five-repeat hTelo sequences.

hTelo5

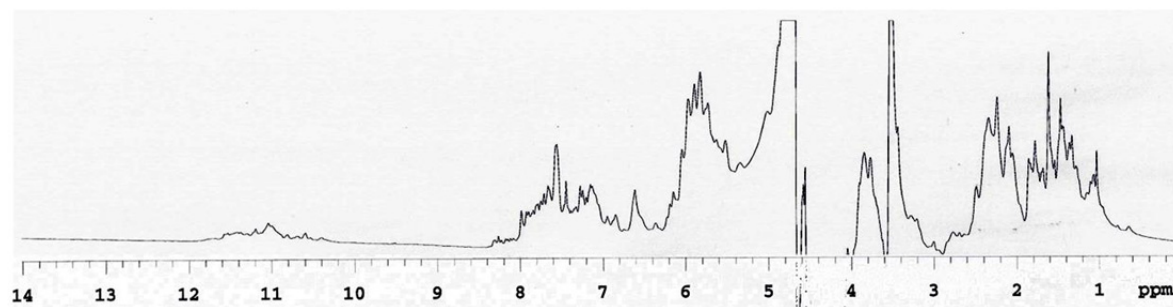

hTelo 5'-OG

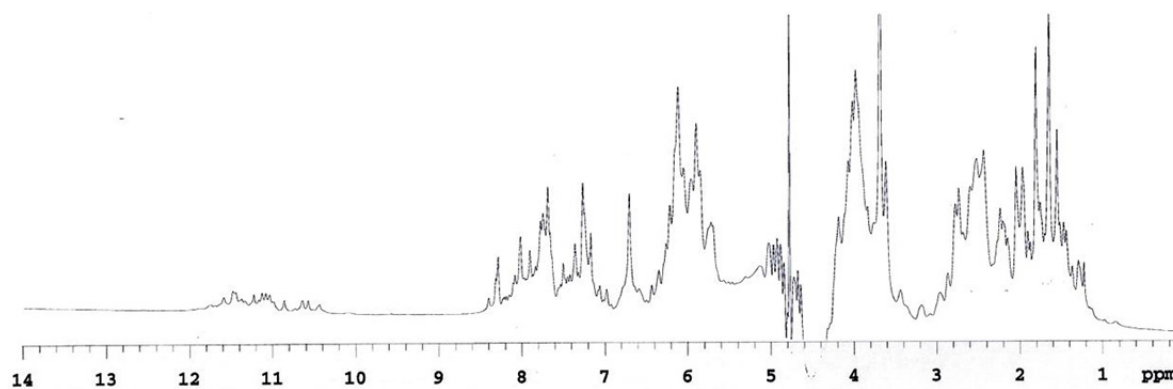

hTelo mid-OG

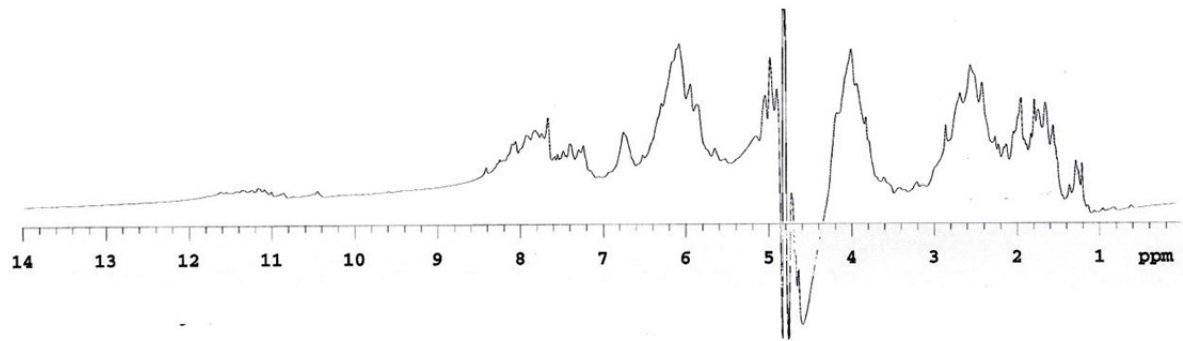

hTelo 3'-OG

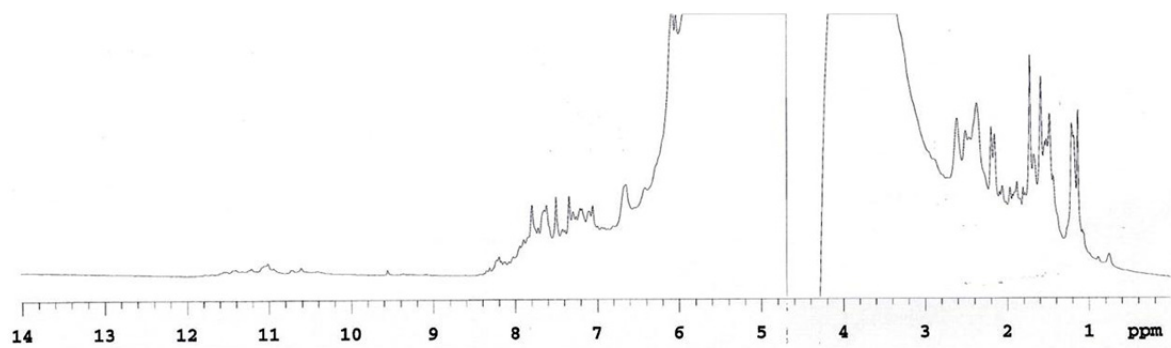

Figure S2. CD and  $T_m$  results for the five-repeat hTelo sequences in 1 M salt.

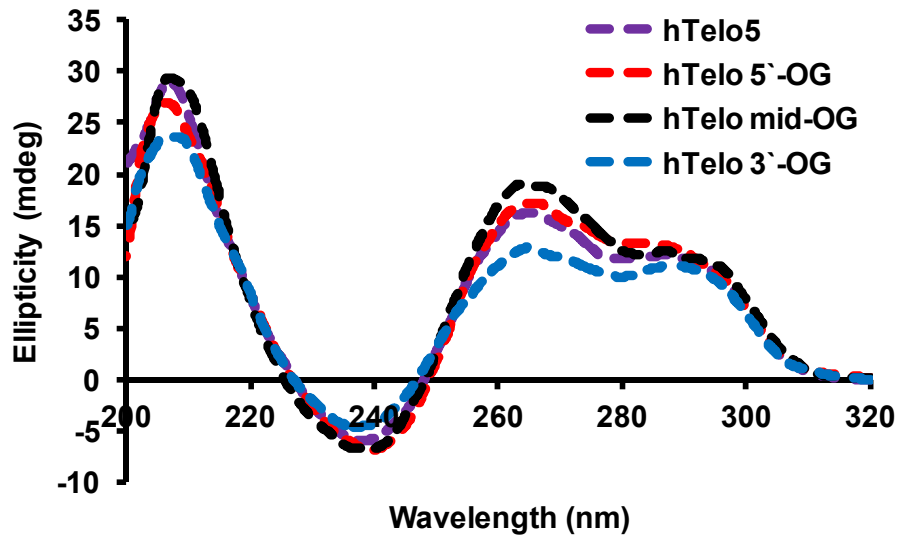

The CD studies were conducted with 3  $\mu$ M DNA in 50 mM KCl, 950 mM LiCl, in 25 mM Tris (pH 7.9).

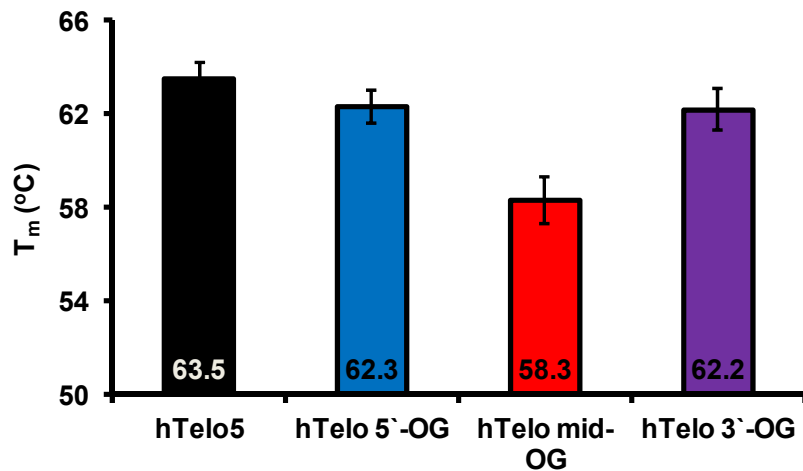

The  $T_m$  studies were conducted with 3  $\mu$ M DNA in 50 mM KCl and 950 mM LiCl in 25 mM Tris (pH 7.9).

**Figure S3.** Example  $i-t$  traces for the five-repeat hTelo sequences.

Traces for hTelo5 (wild-type sequence)

Type 1 Events (triplex)

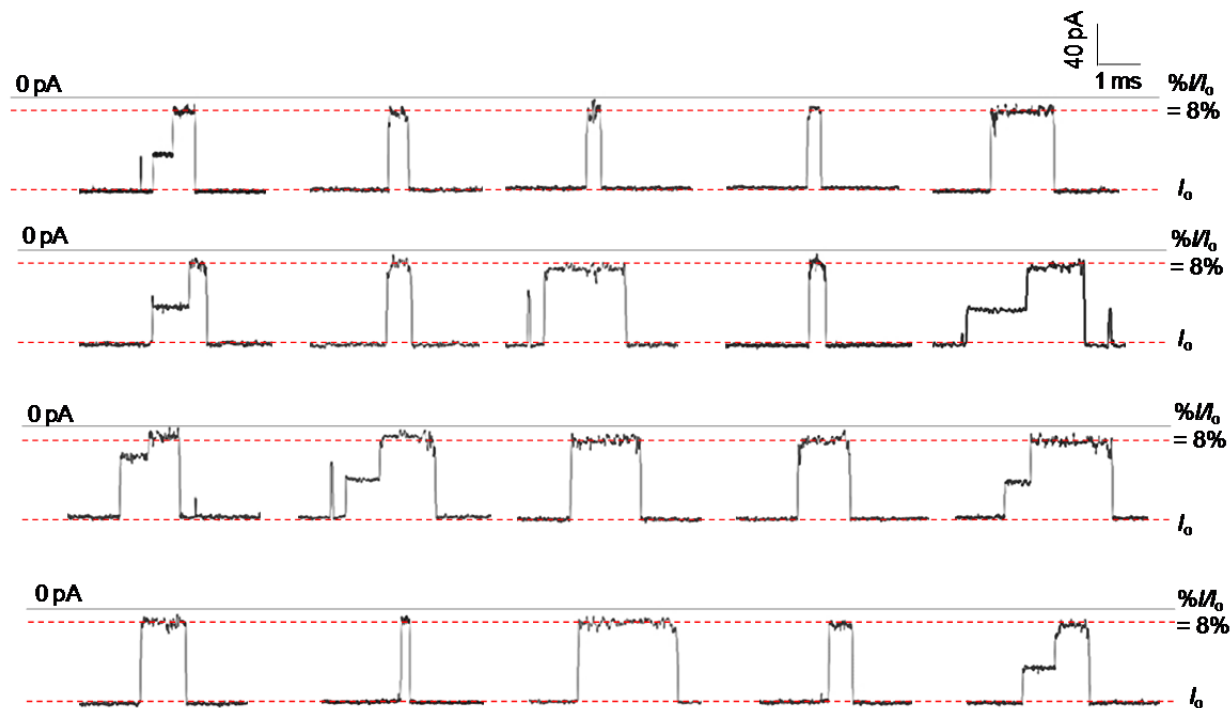

Type 2 Events (Hybrid G4s)

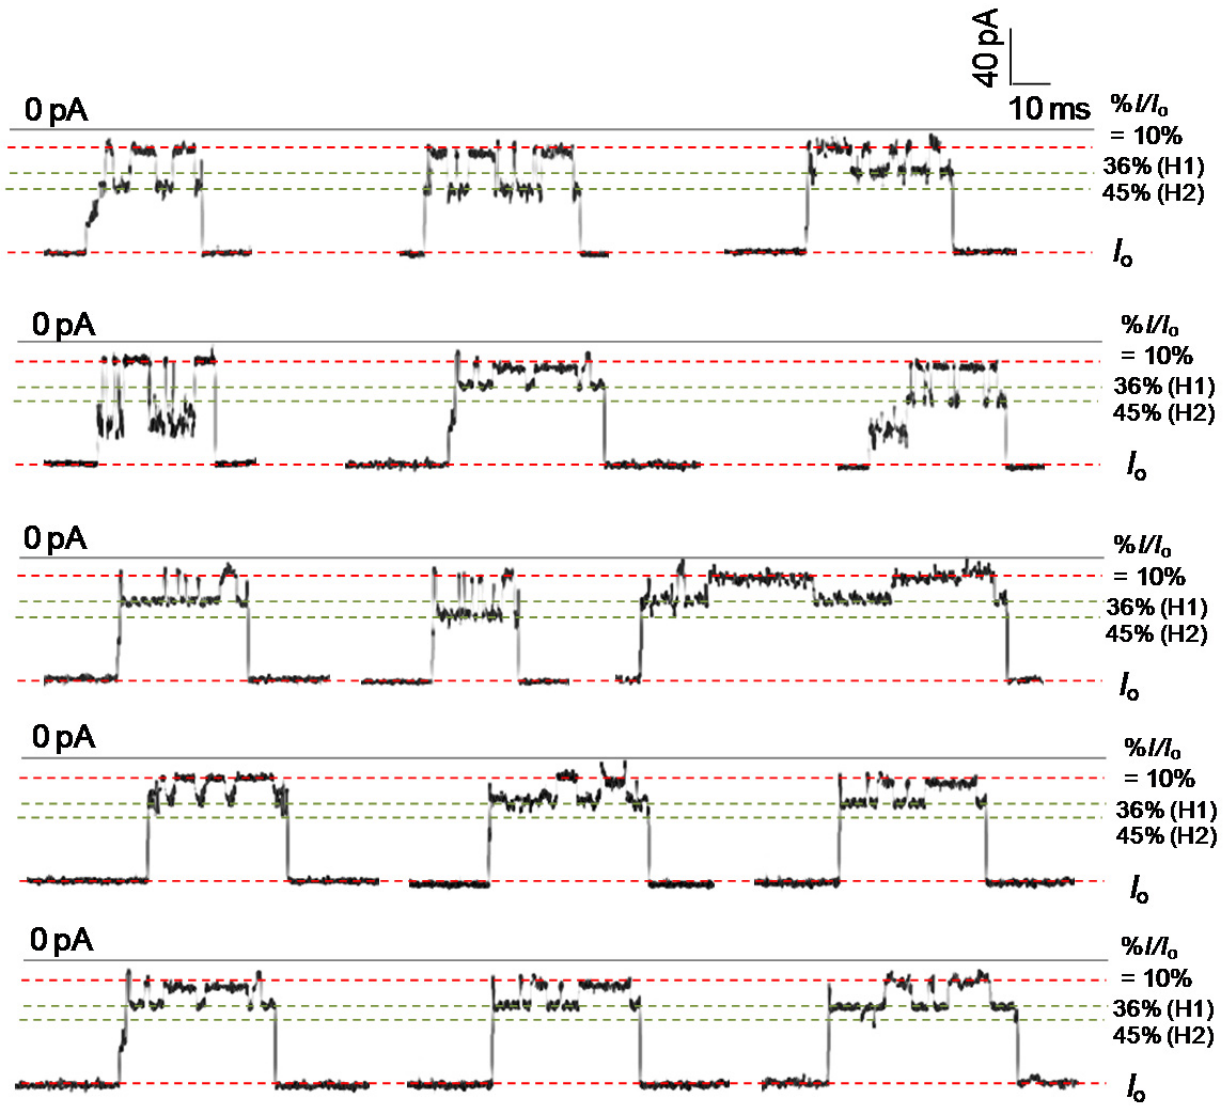

Long Type 2 Event (Hybrid G4)

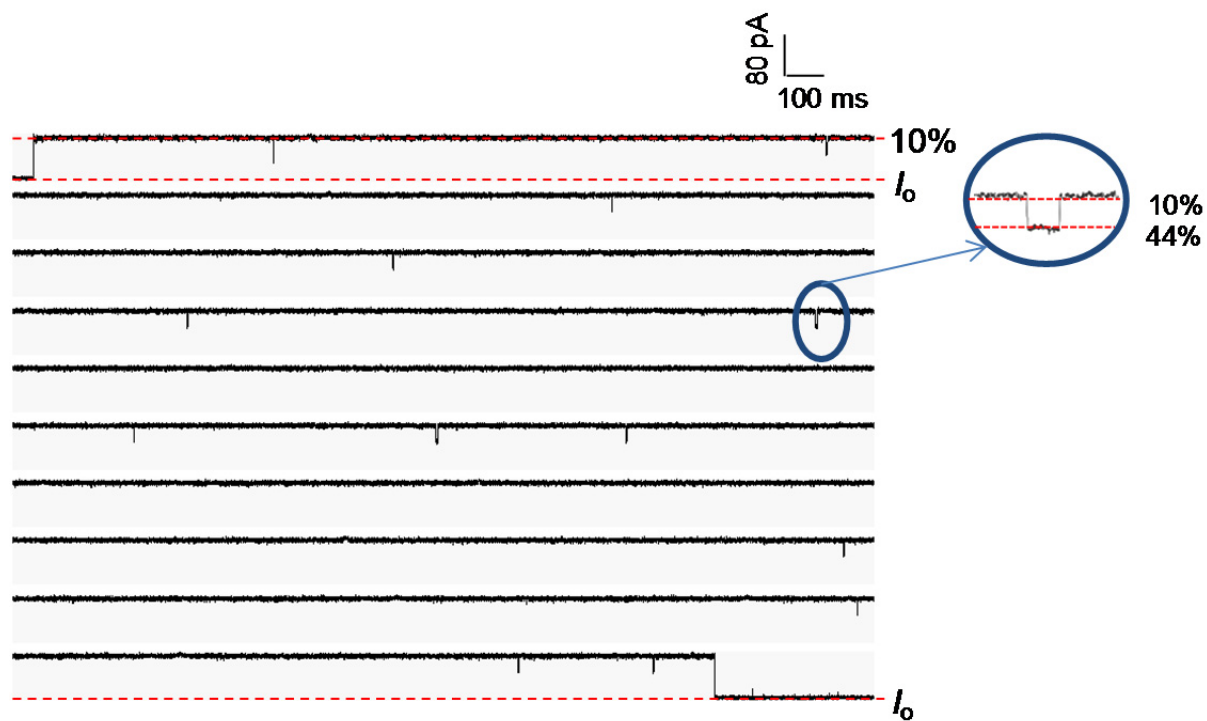

Unidentifiable events that represent ~7% of the total events

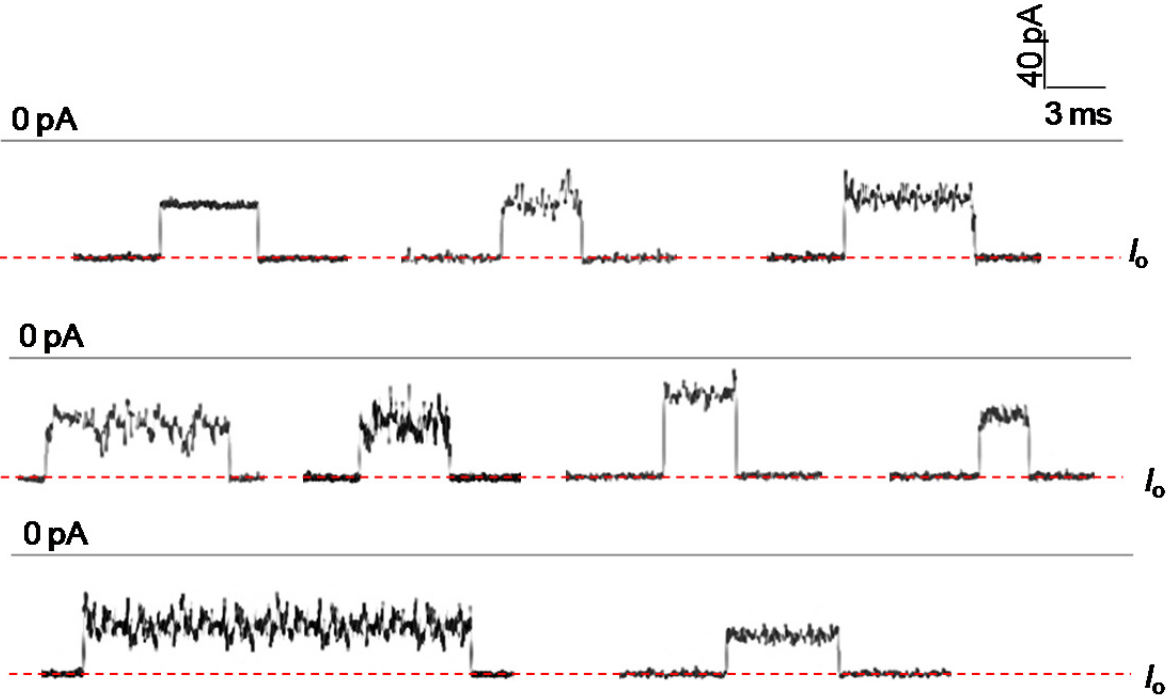



Traces for hTelo 5'-OG

Type 1 Events (triplex)

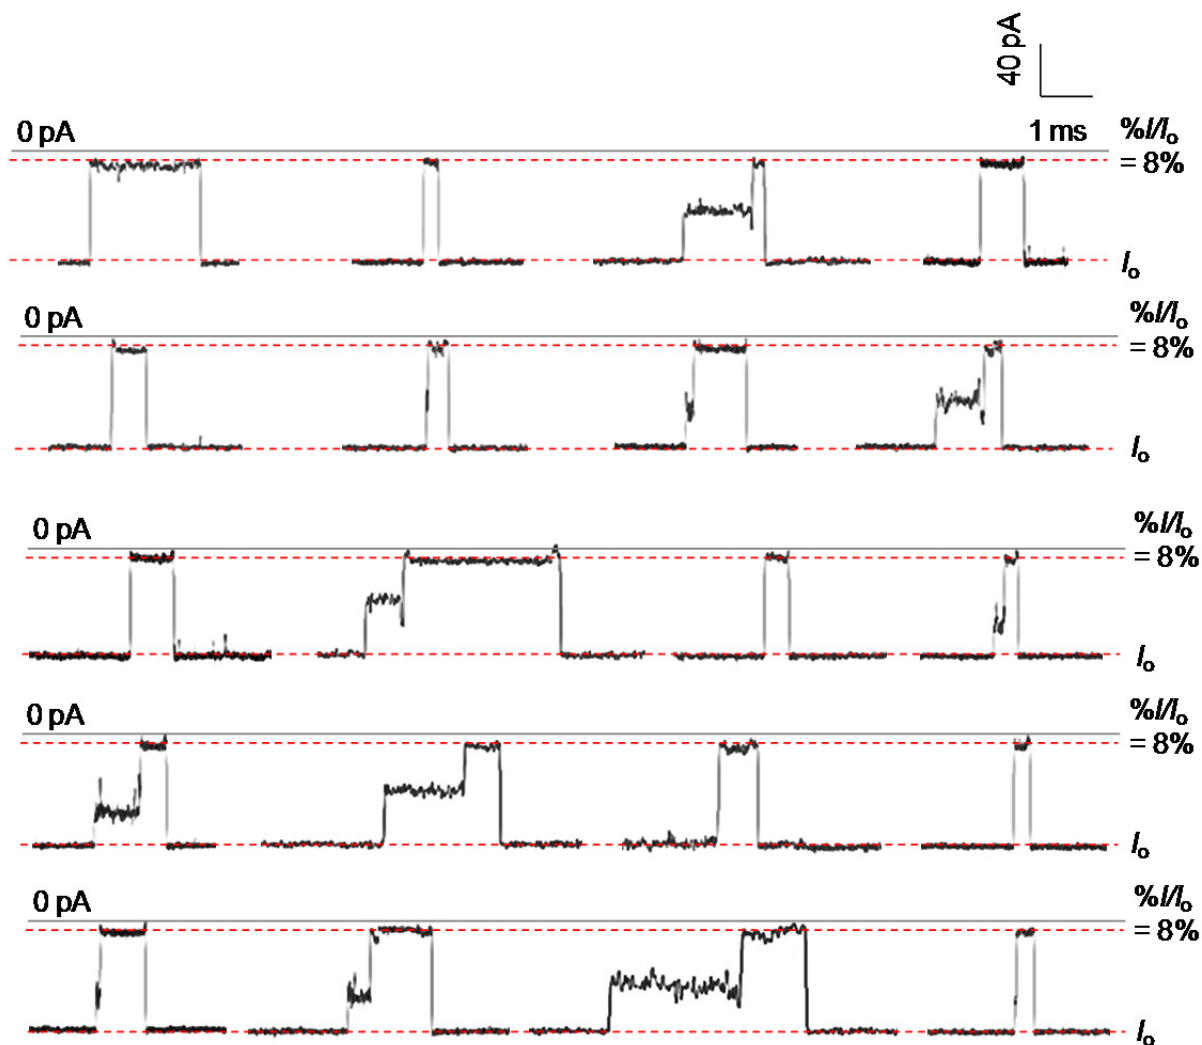

Traces for hTelo 5'-OG

Type 2 Events (hybrid)

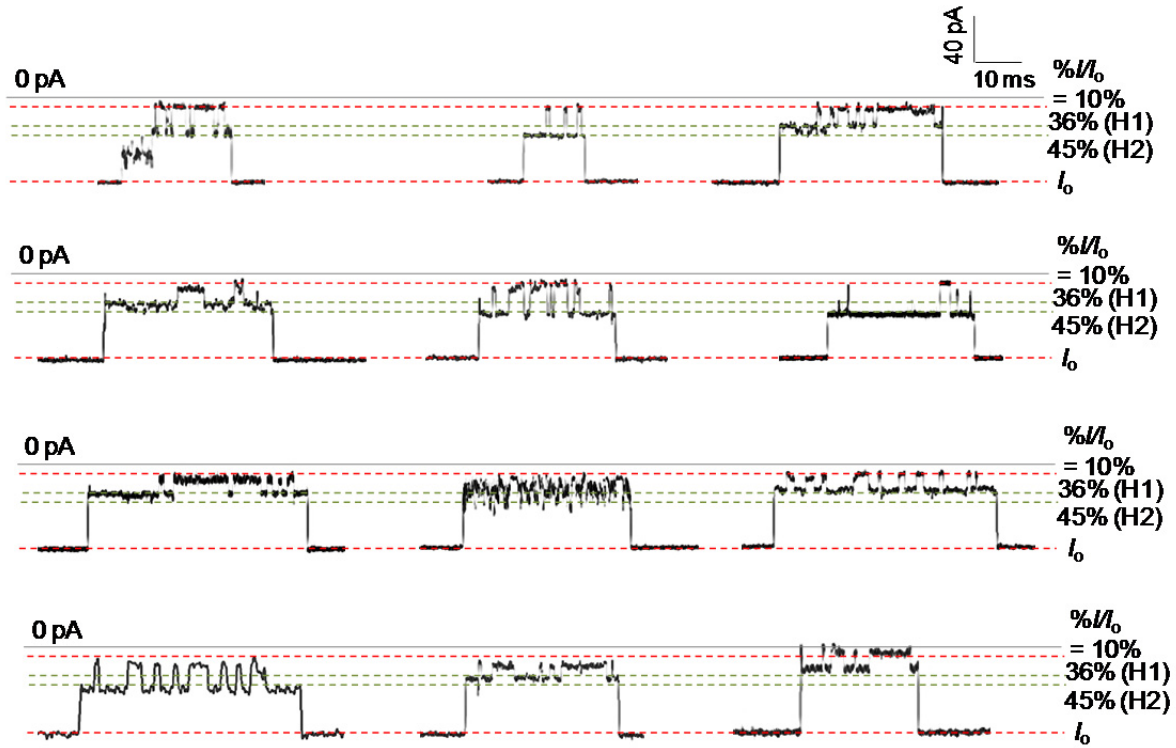

Long Type 2 Event (Hybrid G4) hTelo 5'-OG

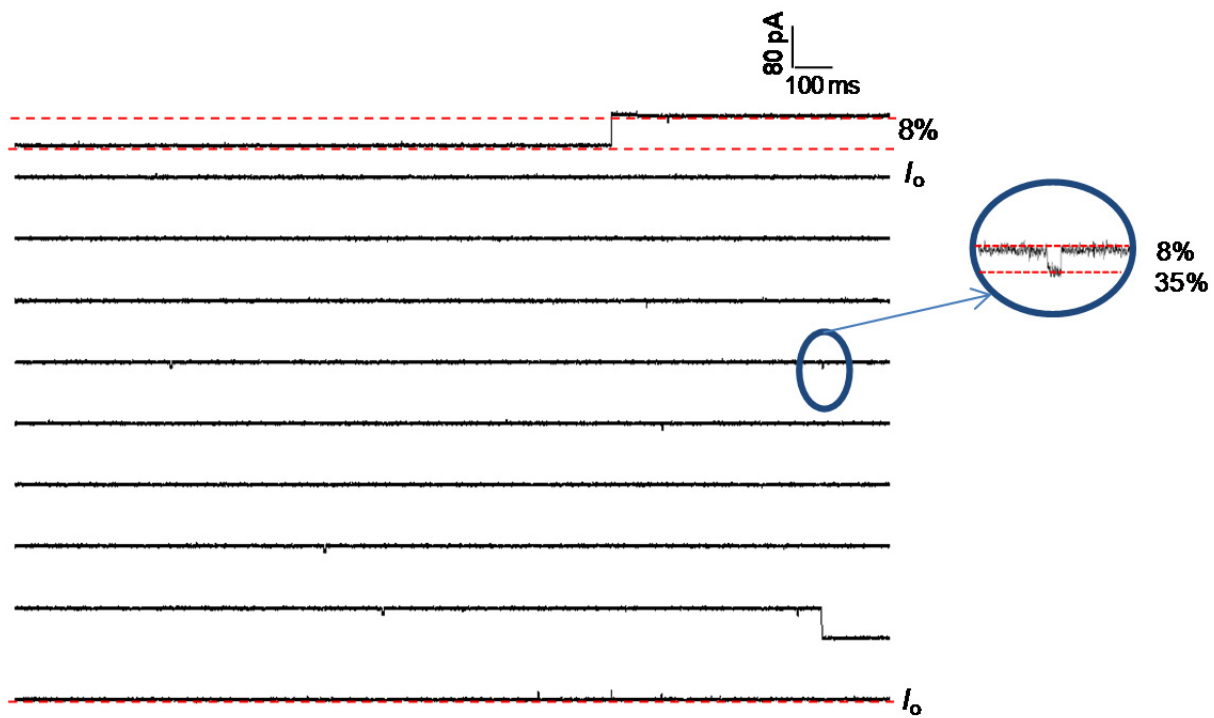

Unidentifiable events that represent ~7% of the total events

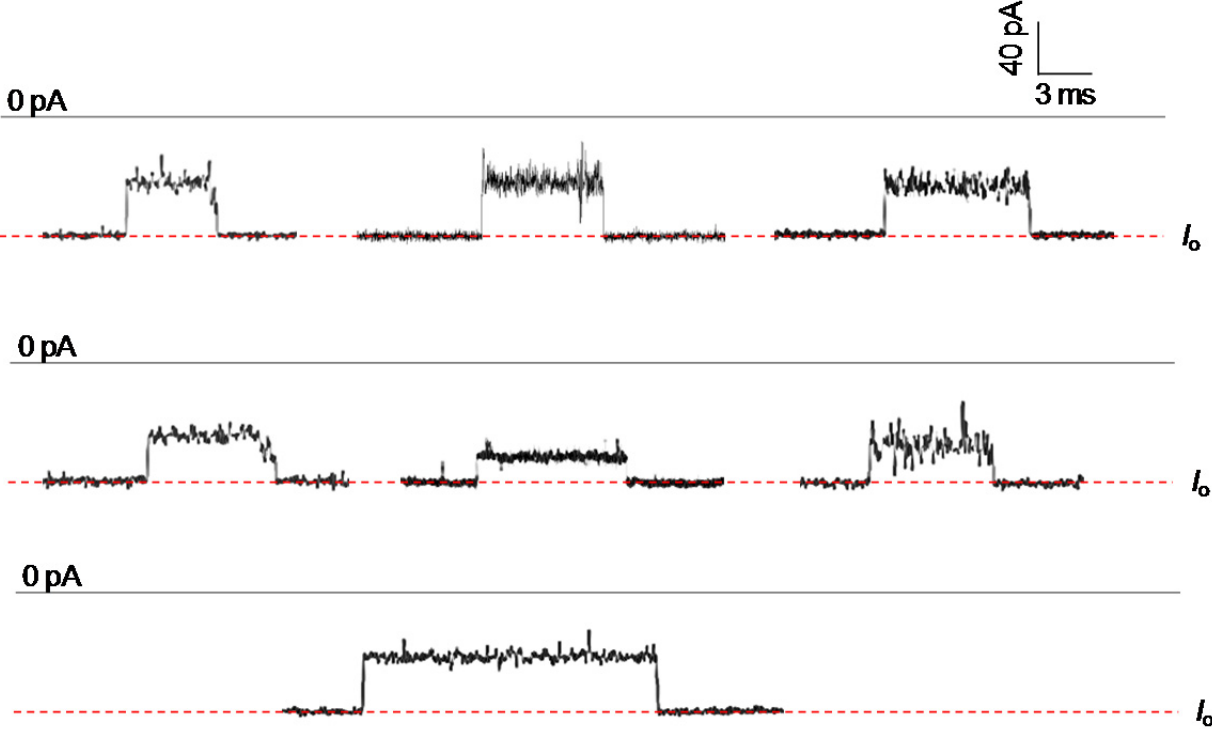

Traces for hTelo 3'-OG

Type 1 Events (triplex)

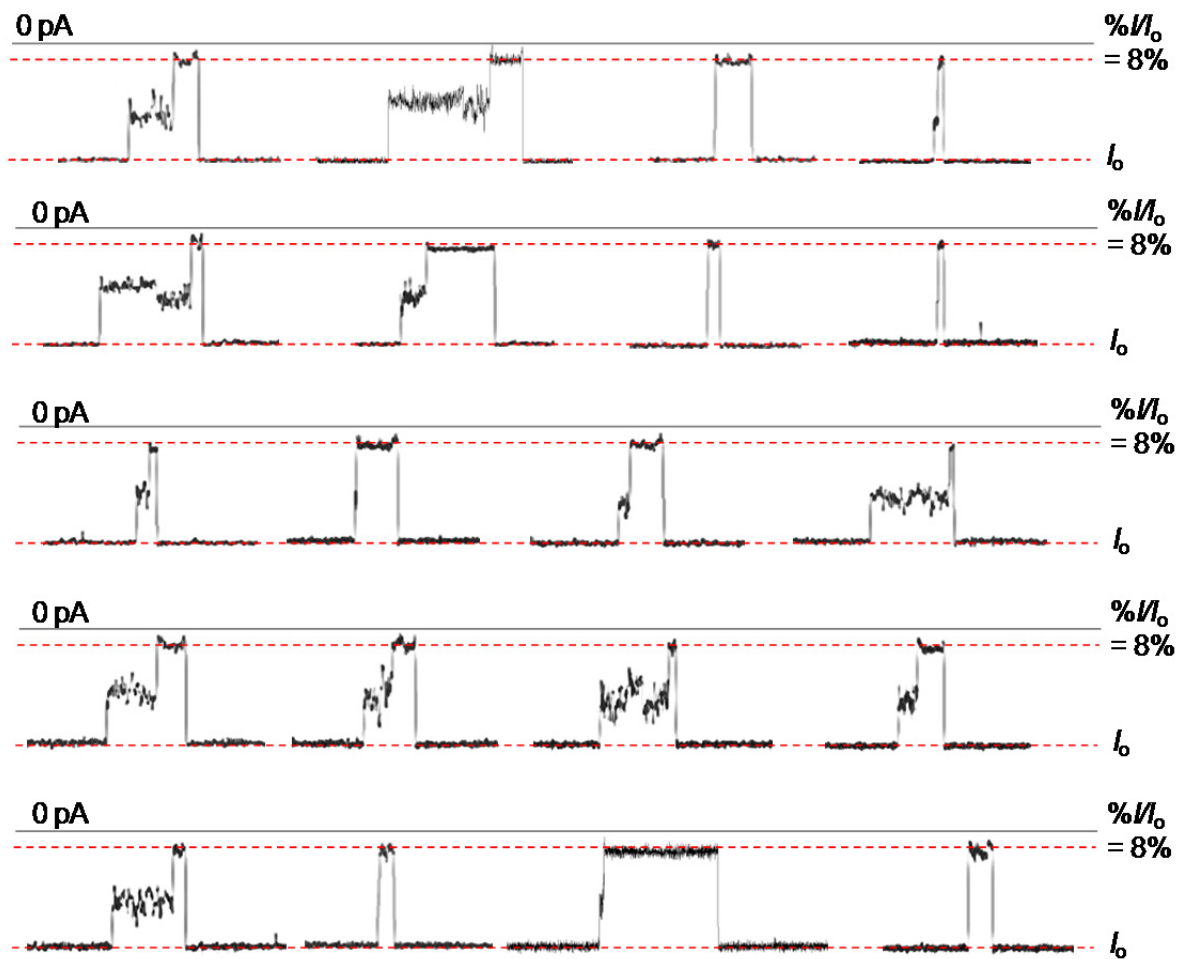

Traces for hTelo 3'-OG

Type 2 Events (hybrid)

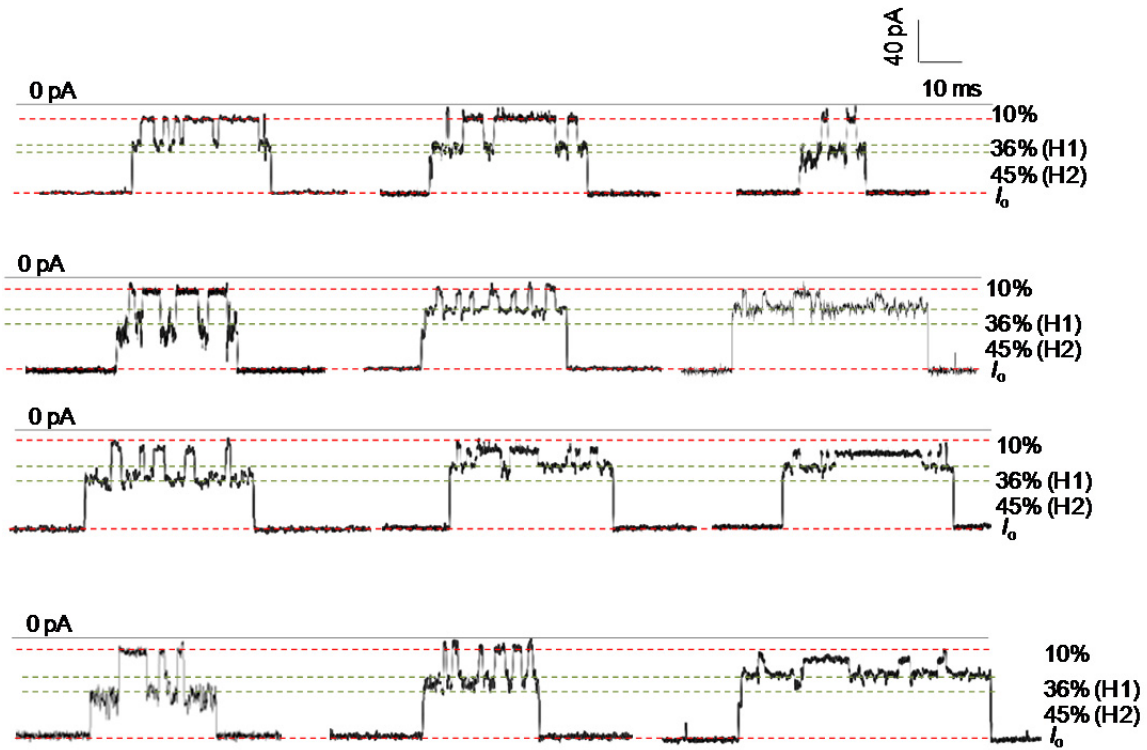

Long Type 2 Event (Hybrid G4) hTelo 3'-OG

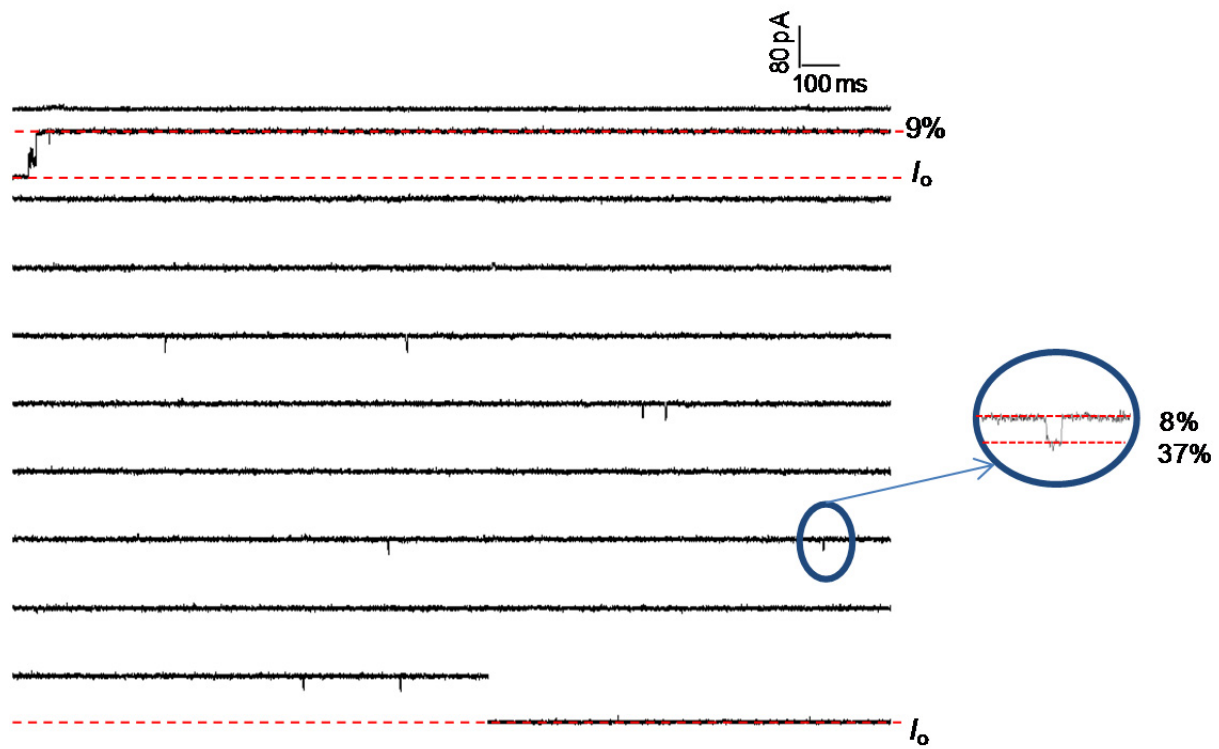

Unidentifiable events that represent ~7% of the total events

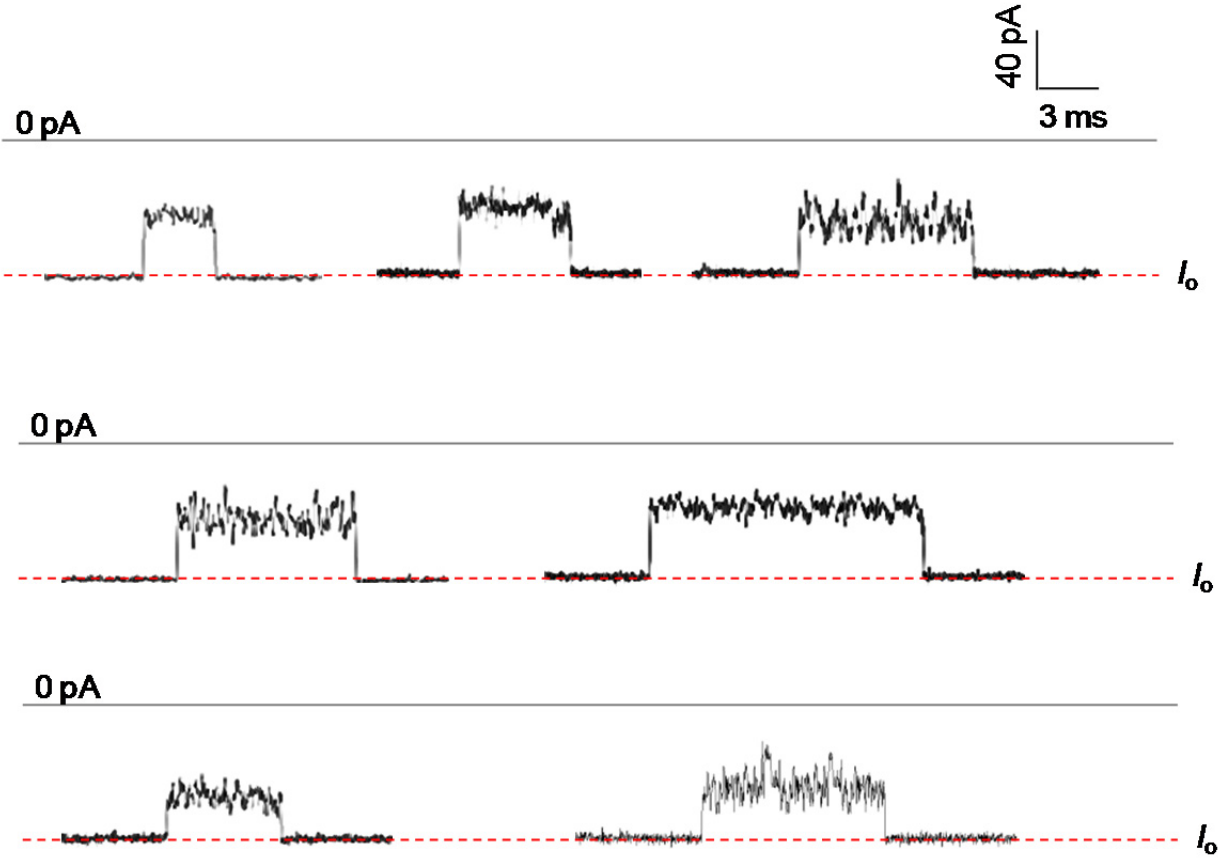



**Figure S4.** Time dependency on voltage for the triplex fold (Type 1 events).

| Voltage (mV) | $\tau$ (ms)    |
|--------------|----------------|
| 100          | $0.97 \pm 0.1$ |
| 120          | $0.76 \pm 0.1$ |
| 160          | $0.43 \pm 0.1$ |

**Figure S5.** Time dependency on voltage for the hybrid folds (Type 2 events).

| Voltage (mV) | T (ms)       |
|--------------|--------------|
| 100          | $31 \pm 5$   |
| 120          | $69 \pm 9$   |
| 160          | $366 \pm 31$ |
